# Supplementary material
Source: ML conference proceedings conference paper supplement (https://openreview.net/forum?id=bLpUtGyf9g)

Query: A cop is sitting for a interview in uniform.  
Video: Gwdizqh16JY\_210.0\_360.0

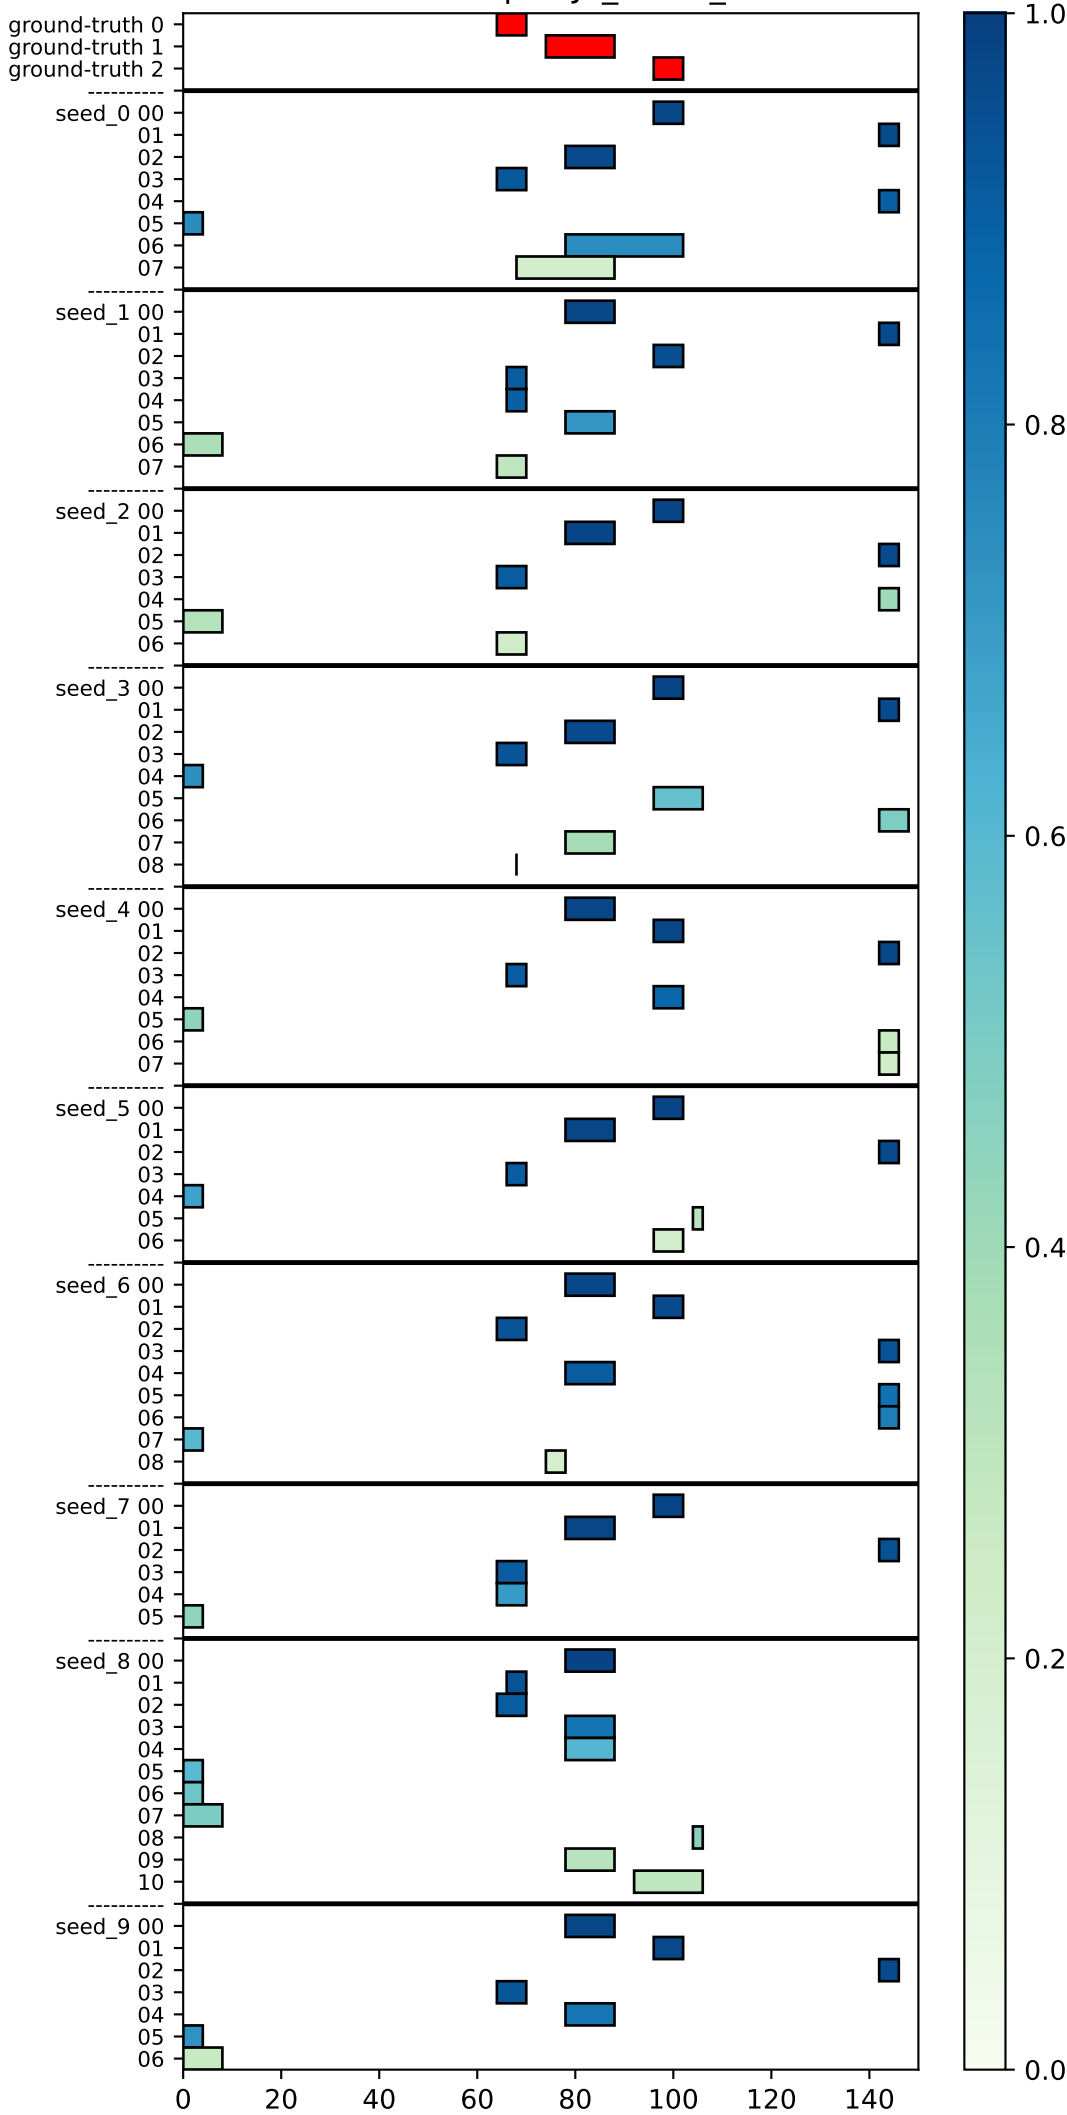

Supplement: supplementary_material [file attachment]

Query: Man shows the video of police from his phone.  
Video: yutpAXhjMII\_60.0\_210.0

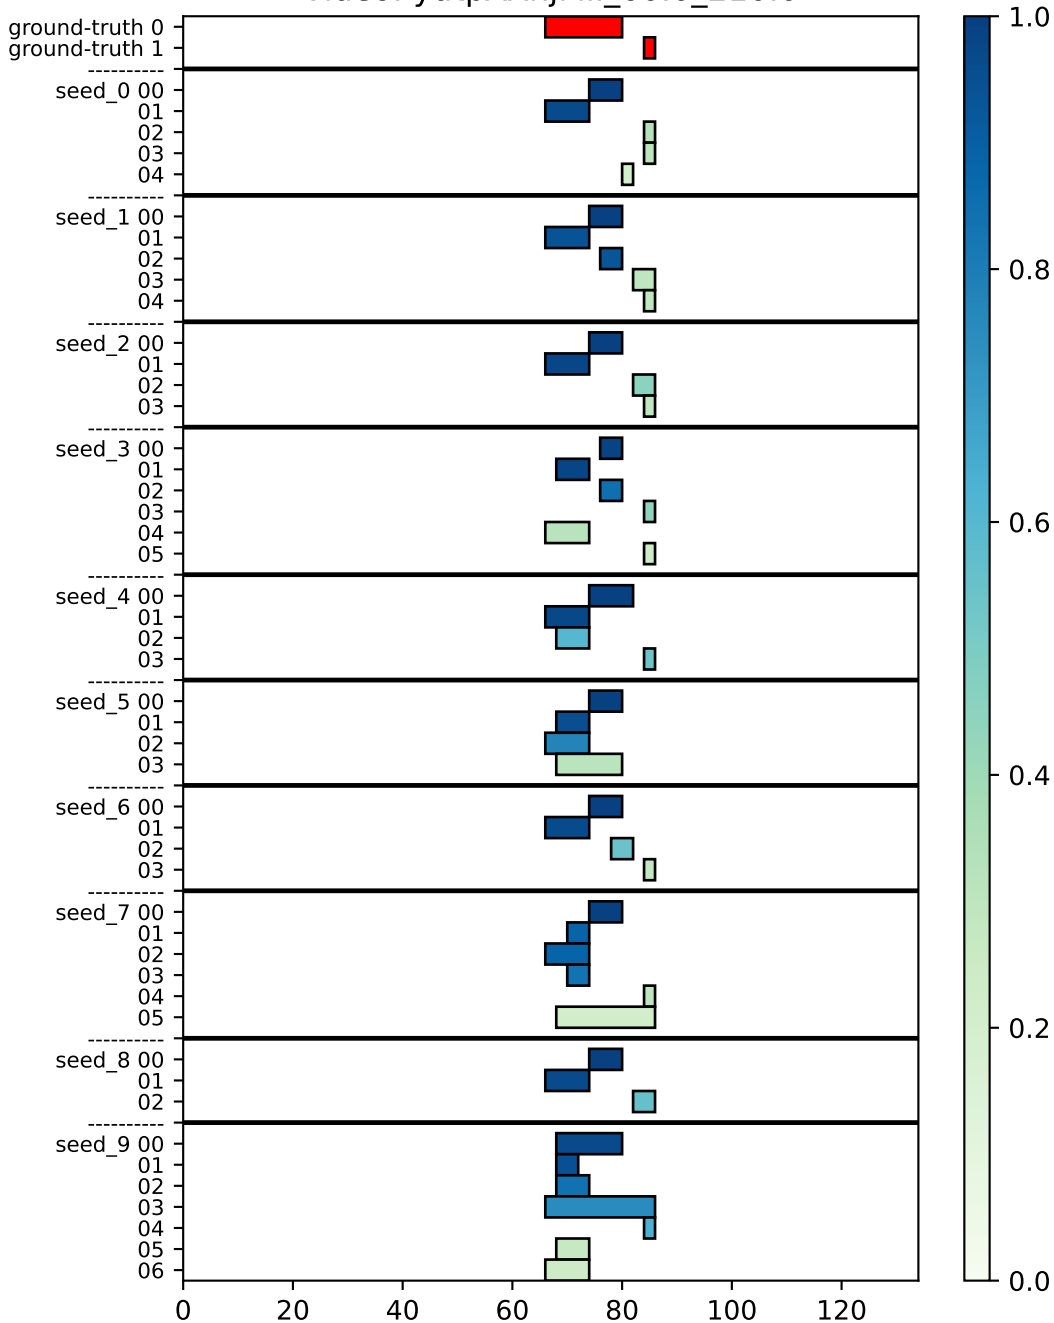

Supplement: supplementary_material [file attachment]

Query: Woman is wearing a black shirt in front of a fireplace.  
Video: VrsI2ZU1LWg\_60.0\_210.0

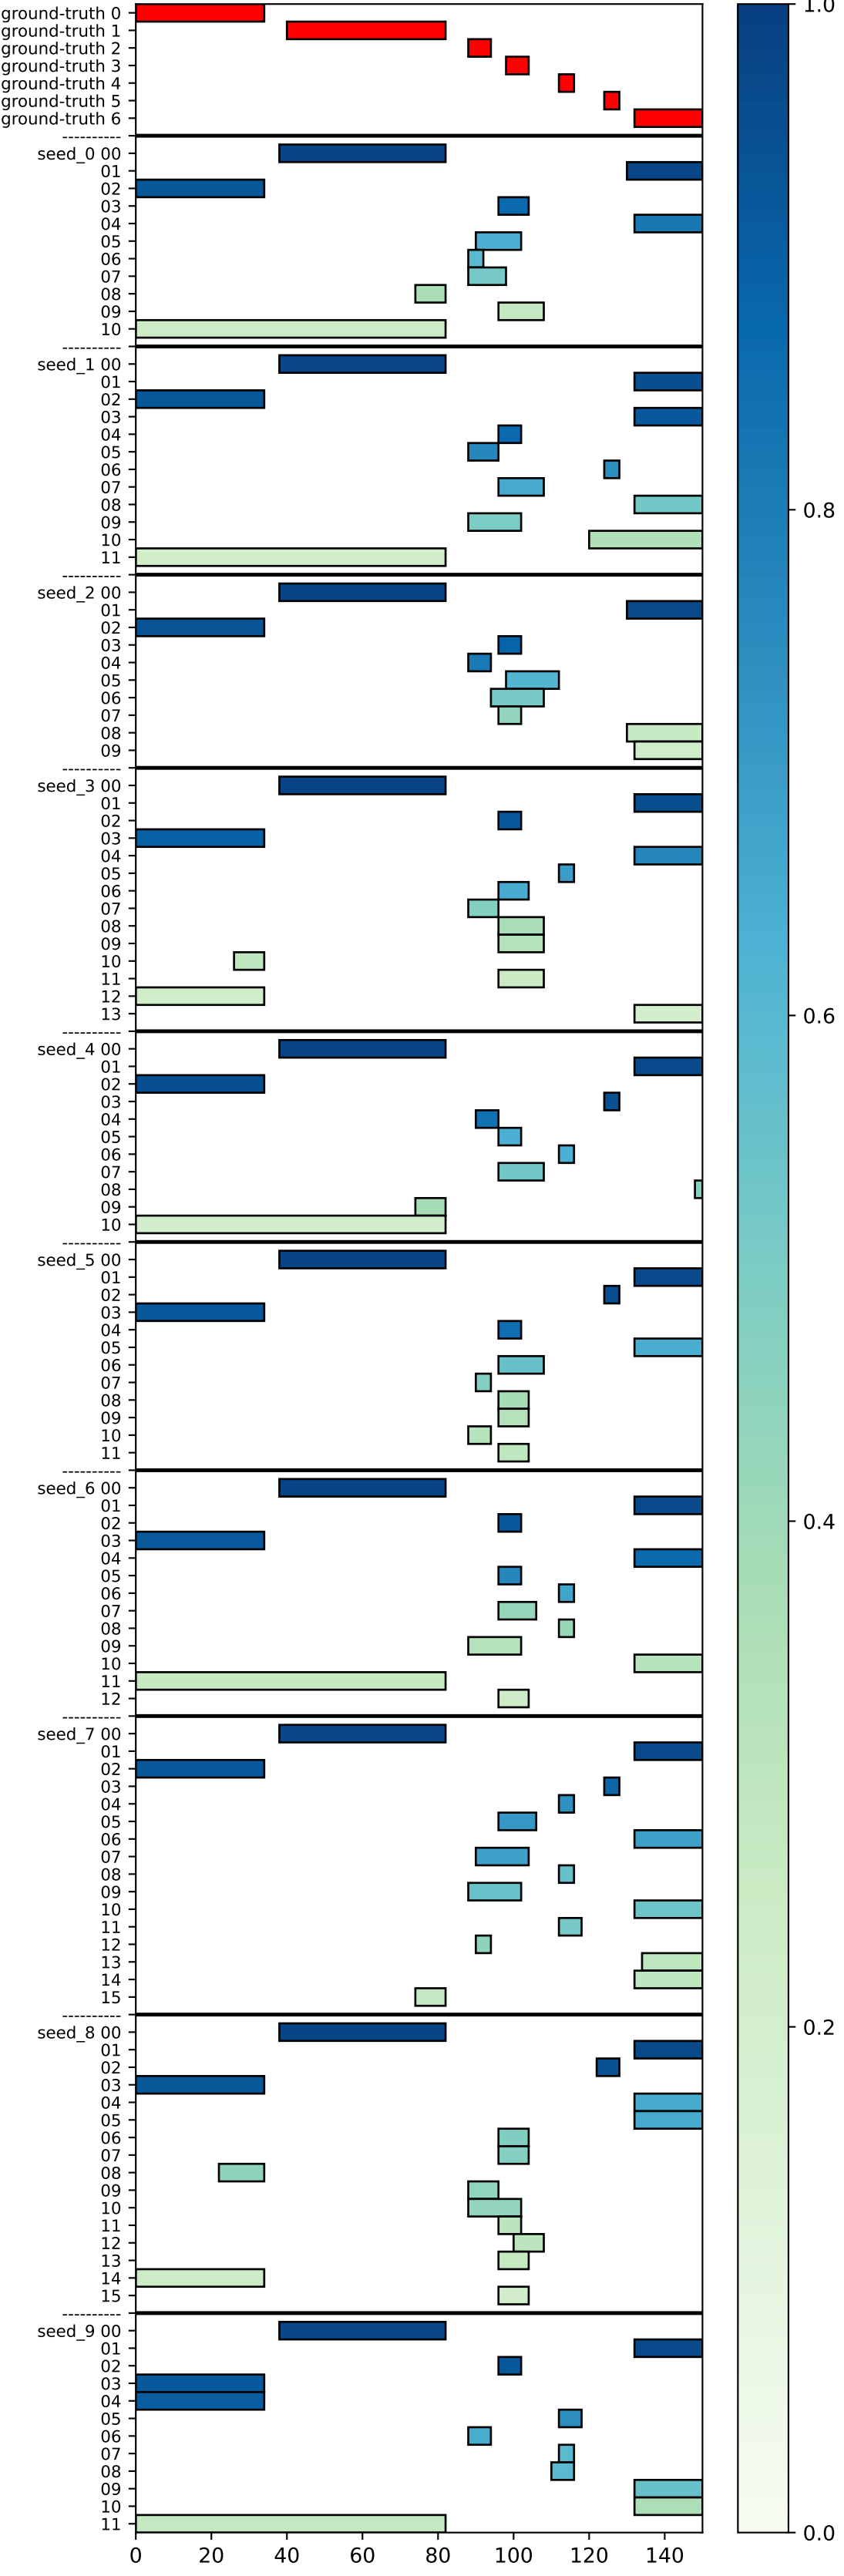

Supplement: supplementary_material [file attachment]
